# Supplementary material for: High electrocatalytic activity of low-loaded transparent carbon nanotube assemblies for CoII/III-mediated dye-sensitized solar cells
Source: Royal Society of Chemistry journal article supplement (doi:10.1039/c3ta13959j), 2013-11-29
Supplement: c3ta13959j.pdf [file c3ta13959j.pdf]

## Electronic Supplementary Information

# High electrocatalytic activity of low-loaded transparent carbon nanotube assemblies for Co<sup>II/III</sup>-mediated dye-sensitized solar cells

Seon Hee Seo,<sup>\*a</sup> Mi Hyung Kim,<sup>a</sup> Eun Ji Jeong,<sup>ab</sup> Sung Hwan Yoon,<sup>a</sup> Hyon Chol Kang,<sup>b</sup> Seung I. Cha<sup>a</sup>  
and Dong Yoon Lee<sup>a</sup>

<sup>a</sup>Nano Hybrid Technology Research Center, Korea Electrotechnology Research Institute, Changwon 641-120, Korea.

<sup>b</sup>Department of Advanced Materials Engineering, College of Engineering, Chosun University, Gwangju 501-759, Korea.

\*Corresponding author: seosh@keri.re.kr

## 1. Experimental Details

### *Fabrication of TiO<sub>2</sub> photo-anodes*

To fabricate the photo-anodes for the DSCs, compact TiO<sub>2</sub> layers were introduced on bare FTO glasses from a solution of diisopropoxytitanium bis(acetylacetonate) in isopropanol (Aldrich) by screen printing. The formed layers were then heated at 500 °C for 15 min. To form mesoporous TiO<sub>2</sub> layers, 5 g of anatase TiO<sub>2</sub> nanoparticles (particle size <25 nm, 99.7%, Aldrich) were mixed with 0.5 g of dodecanoic acid (Fluka) in 150 ml of anhydrous ethanol and ball-milled for 3 days. 2.2 g of the resultant dried powder was mixed with 10 g of ethanol solution containing 10 wt% ethyl cellulose (EC, viscosity 46 cP, 5 % in toluene/ethanol 80:20, Aldrich) and 10 g of  $\alpha$ -terpineol (90%, Aldrich). After ball-milling of the mixture, the remaining ethanol was evaporated. The resultant viscous paste was milled in a three-roll mill, which gives a 3.7- $\mu$ m-thick transparent TiO<sub>2</sub> layer per a screen printing (200 mesh, stainless steel). In order to enhance the photocurrent of the normal DSCs, a 7- $\mu$ m-thick scattering layer (PST-400C, CCIC-JGC, Japan) was prepared on top of the dried transparent layer. In case of the transparent bifacial DSCs, the top layer was replaced with a 1.4- $\mu$ m-thick highly transparent TiO<sub>2</sub> layer prepared by modifying a commercial TiO<sub>2</sub> paste (PST-18NR, CCIC-JGC, Japan). 6 g of PST-18NR was mixed with 11.6 g of 10 wt% EC ethanol and 6 g of terpineol and the rest processes were similar to those for the bottom transparent TiO<sub>2</sub> layer. After the annealing of the TiO<sub>2</sub> layers at 480 °C for 60 min, the TiO<sub>2</sub> electrodes were immersed in a 30 mM aqueous solution of TiCl<sub>4</sub> for 30 min in an oven at 70 °C and then washed with water. Finally, the TiCl<sub>4</sub>-treated TiO<sub>2</sub> electrodes were annealed at 450 °C for 30 min, and then soaked in 0.3 mM toluene solution of the dye MK-2 (2-Cyano-3-[5'''-(9-ethyl-9H-carbazol-3-yl)-3',3'',3''',4-tetra-n-hexyl-[2,2',5',2'',5'',2''']-quaterthiophen-5-yl] acrylic acid, Aldrich) dye at RT for 15 h.

### Calculation of the electroactive surface area

The electroactive surface area for the reduction of the electroactive species can be estimated from cathodic peak current ( $I_{p,c}$ ) using the Randles-Sevcik equation: <sup>S1</sup>

$$I_{p,c} = (2.69 \times 10^5) n^{3/2} A D^{1/2} C \nu^{1/2}$$

where  $n$  is the number of electrons exchanged,  $A$  is the electroactive surface area,  $D$  is the diffusion coefficient,  $C$  is the concentration of the electroactive species, and  $\nu$  is the scan rate. For the  $\text{Co}(\text{bpy})_3^{2+/3+}$  redox reaction, using  $n = 1$ ,  $D = 6.4 \times 10^{-6} \text{ cm}^2/\text{s}$ , and the values of  $I_{p,c}$  measured on the basis of the capacitive backgrounds, the electroactive surface areas of the ca-SWNT electrodes assembled on hydroxyl and APTES-modified FTO substrates were estimated at  $0.348 \text{ cm}^2$  and  $0.361 \text{ cm}^2$ , respectively, for the reduction of the  $\text{Co}(\text{bpy})_3^{3+}$  redox mediator.

### Calculation of the charge-transfer resistance ( $R_{CT}$ )

The EIS data obtained using the symmetrical closed dummy cells were interpreted using the well-known equivalent electrical circuit shown in Scheme S2. <sup>S2</sup> EIS involves the charge-transfer impedance at the electrode/electrolyte interface ( $Z_{CT}$ ) in the high-frequency region and the diffusion impedance ( $Z_D$ ) of the electroactive species within the electrolyte in the low-frequency region. The  $x$  intercept of the high-frequency domain is associated with the frequency-independent ohmic resistance ( $R_0$ ).

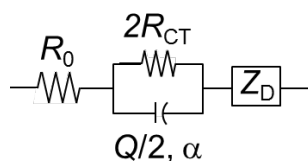

To obtain a better fit, rather than using capacitance, we adopted a constant phase element (CPE) with an exponent  $\alpha$ . The deviation of  $\alpha$  from 1 represents the reactivity distribution of the electrode. When  $\alpha = 1$ , the CPE behaves as a capacitor and  $R_{CT}$  is equal to the radii of the semicircles measured using the symmetrical closed dummy cells. The effective double-layer capacitance ( $C_{dl}$ ) was also estimated from  $Q$ ,  $\alpha$ , and  $\omega_{max}$  on the basis of the following relationship,  $C_{dl} = Q(\omega_{max})^{\alpha-1}$ , where  $\omega_{max}$  is the peak frequency at which the imaginary part of the impedance reaches its maximum. <sup>S2</sup>

### ***Calculation of the diffusion coefficient of $\text{Co}(\text{bpy})_3^{3+}$***

The limiting current density ( $J_{\text{lim}}$ ) ( $\text{A}/\text{cm}^2$ ) depends on the diffusion of the electroactive species in the thin-layer cell and can be approximated using Fick's first law as follows:

$$J_{\text{lim}} = 2nFD_0 \frac{C_0}{d}$$

where  $D_0$  is the diffusion coefficient of the reduced form of redox couples ( $\text{cm}^2/\text{s}$ ),  $d$  is the spacer thickness (cm),  $C_0$  is the concentration ( $\text{mol}/\text{cm}^3$ ),  $F$  is the Faraday constant, and  $n$  is the number of electrons involved in the electrode reaction. For the  $\text{Co}(\text{bpy})_3^{2+/3+}$  redox reaction in a thin-layer cell, we used  $n=1$ ,  $C_0=45$  mM, and  $d=23$   $\mu\text{m}$ .

## 2. Supplementary data

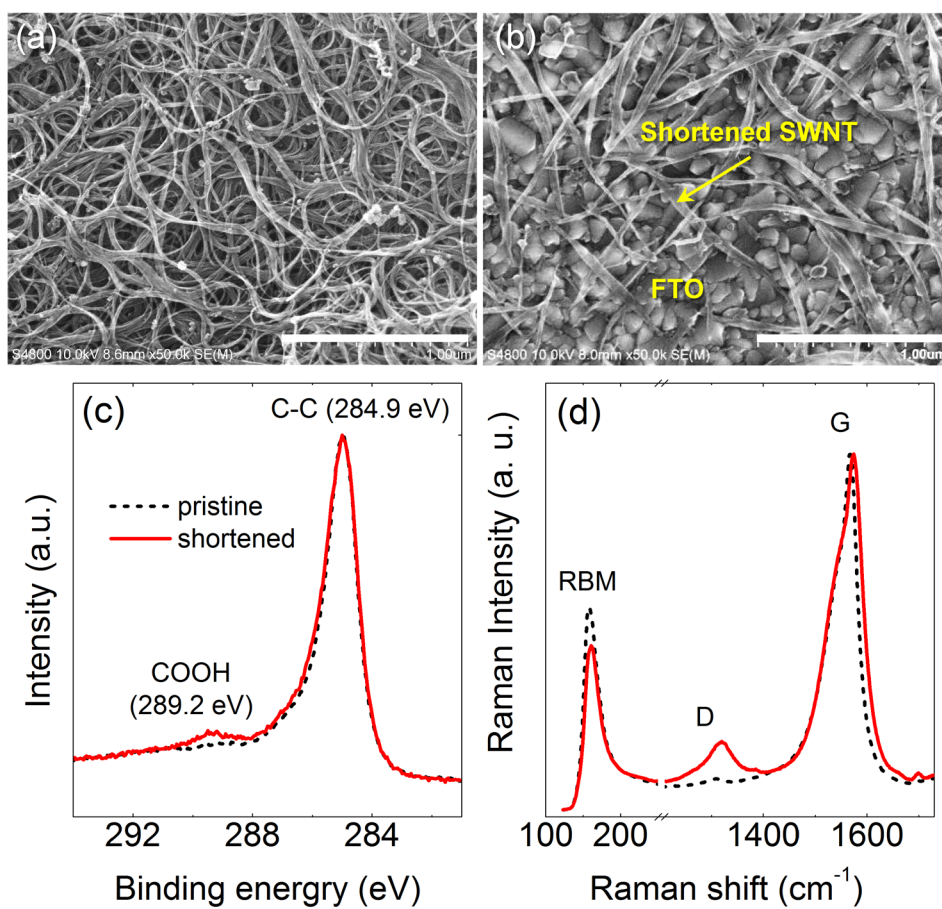

**Fig. S1** SEM images for (a) the pristine SWNT powder and (b) the spray-coated shortened SWNTs, functionalized for 10 h in an acid solution, on a FTO glass. Scale bars are 1  $\mu\text{m}$ . (c) XPS and (d) Raman spectra confirmed that the shortened SWNTs were mainly functionalized with carboxyl groups.

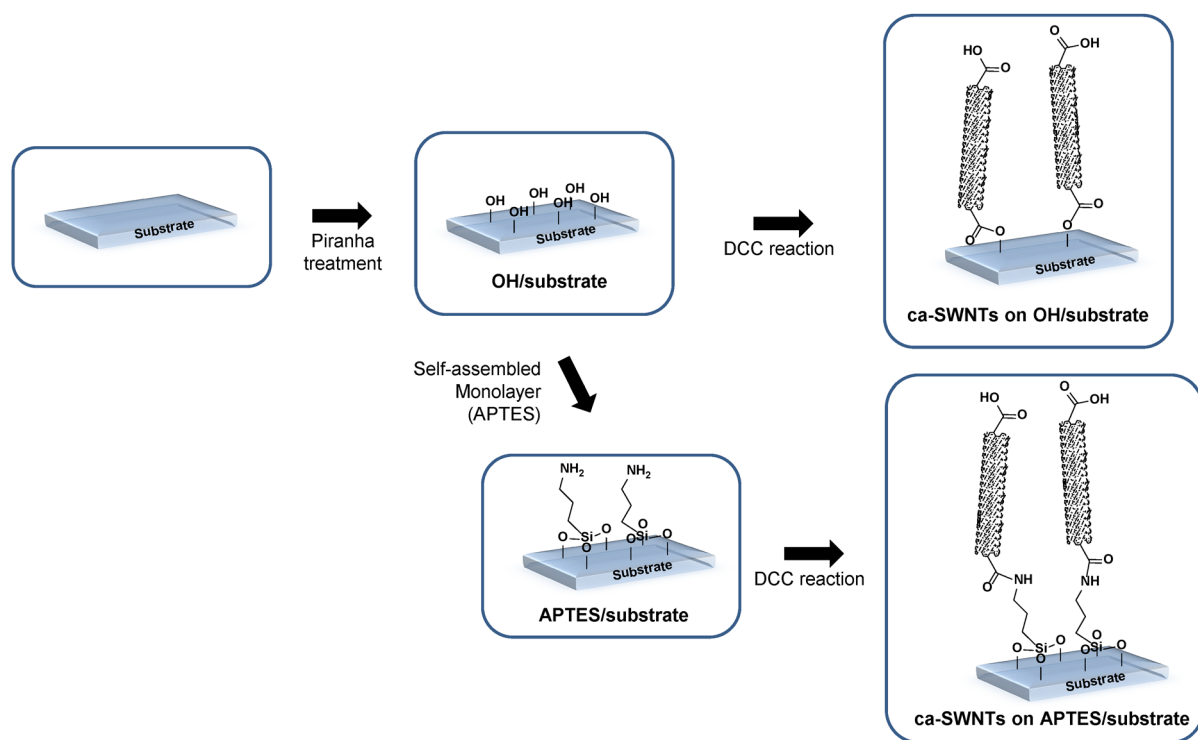

**Fig. S2** A schematic illustration of the fabrication procedure of the ca-SWNT electrodes.

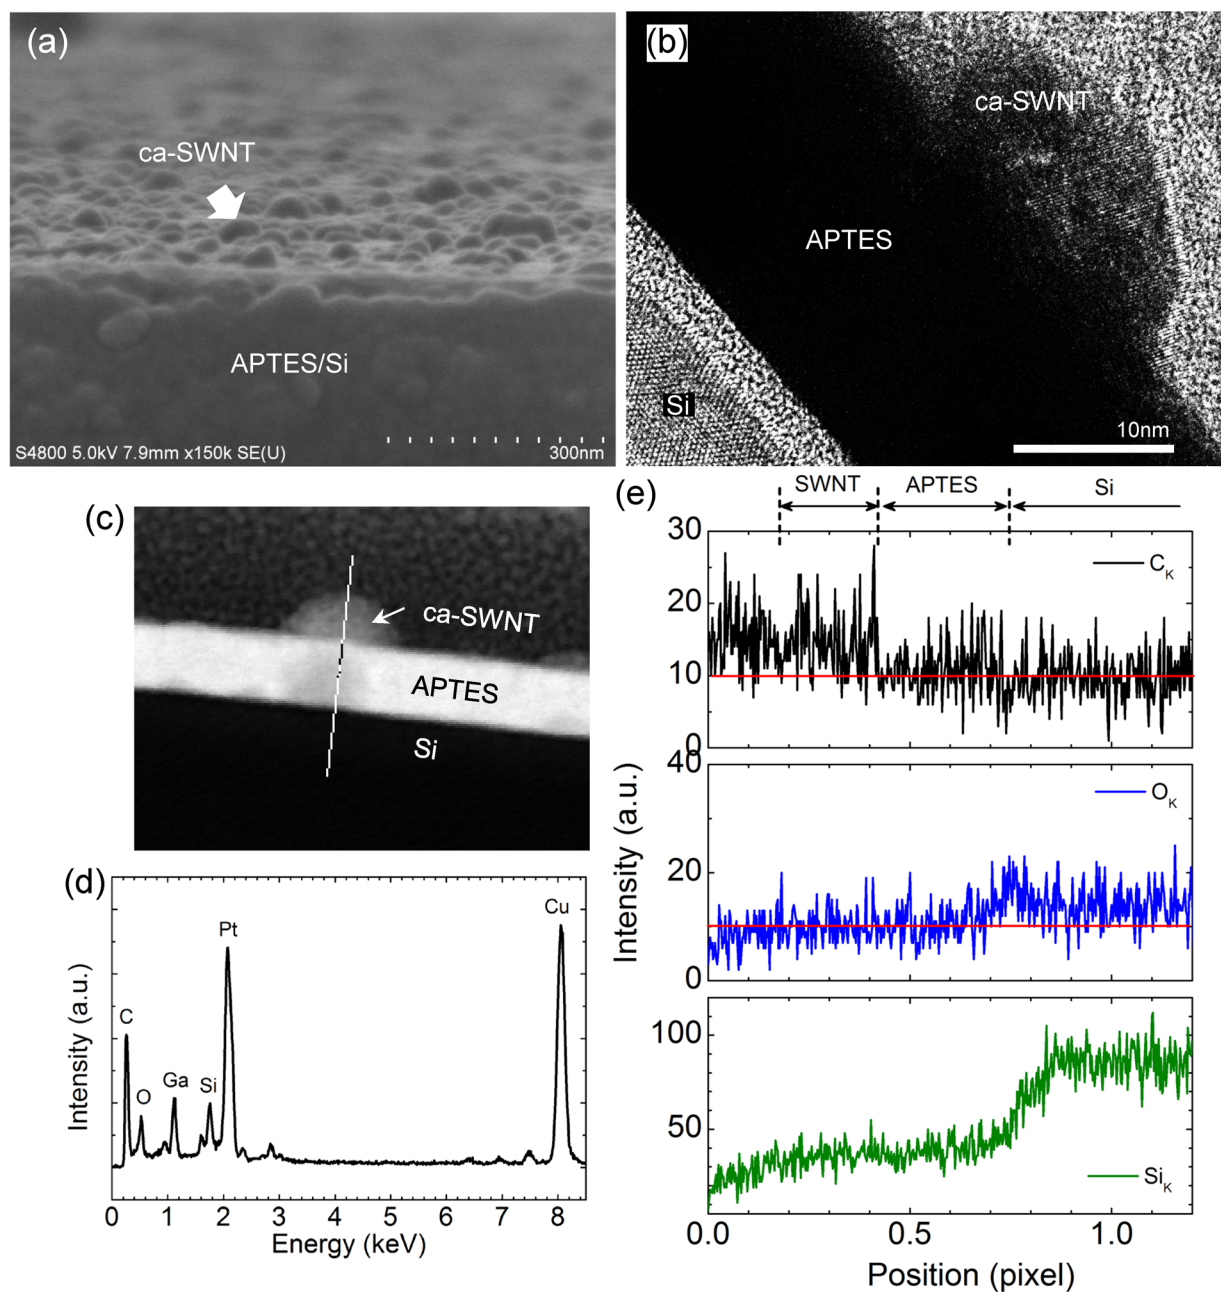

**Fig. S3** Cross-sectional (a) SEM and (b) TEM images of ca-SWNTs on APTES/Si substrates after the DCC reaction for 21 h. A SEM image showed the ca-SWNTs were of wide distribution in their sizes. A TEM image presented well-defined, densely packed lattice structure in a ca-SWNT domain. To confirm the elemental distribution, we undertook the energy dispersive x-ray (EDX) analysis during a TEM measurement. (c) A scan of the selected area in a TEM image. (d) An EDX profile measured from the region in Fig. S3c. It is noteworthy that Ga and Pt signals originated from Ga atoms implanted during a focused ion beam process and a capping layer, respectively. A Cu signal originated from the TEM grid. (e) Intensity profiles of characteristic emissions for C<sub>K</sub>, O<sub>K</sub>, and Si<sub>K</sub>, measured across the sample

indicated by the white arrow in Fig. S3c.  $C_K$  signals from the SWNT are shown clearly, while no noticeable  $O_K$  signals in the SWNT area. This indicates that the ca-SWNT composed of purely carbon rather than impurities during the DCC reaction. Red horizontal lines representing the background level are guides for eyes.

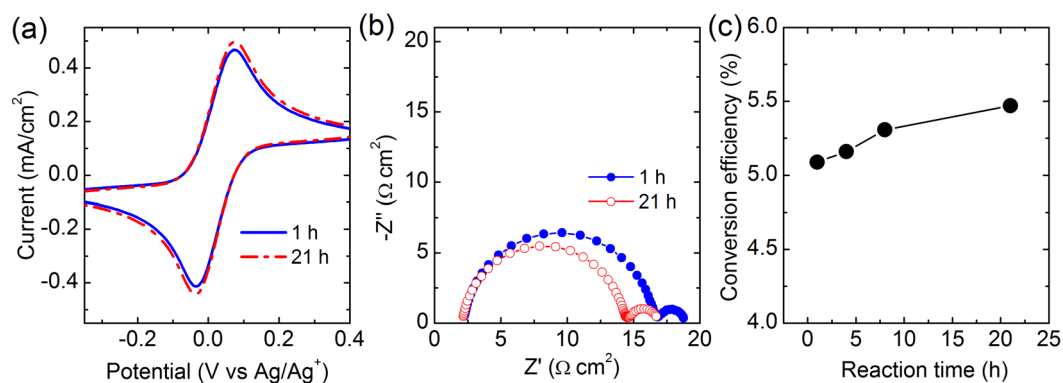

**Fig. S4** (a) CVs for 2 mM  $[\text{Co}(\text{bpy})_3](\text{PF}_6)_2/0.1 \text{ M TBA}\cdot\text{PF}_6$  in acetonitrile using a three-electrode configuration. The ca-SWNT electrodes used were formed for DCC reaction time of 1 h and 21 h. (b) The Nyquist plot of the EIS data obtained under an open-circuit condition using symmetrical closed dummy cells consisting of two identical electrodes. The geometrical configuration and the electrolyte used were the same as those in the DSCs.  $R_{\text{CT}}$  was estimated by fitting the EIS data using symmetrical dummy cells on the basis of a well-established equivalent circuit<sup>S3</sup> (see Experimental Details of ESI).  $R_{\text{CT}}$  roughly corresponds to the radius of a semicircle at a higher frequency in the Nyquist plot. (c) Power conversion efficiencies of DSCs fabricated with the ca-SWNT CEs assembled for different reaction times.



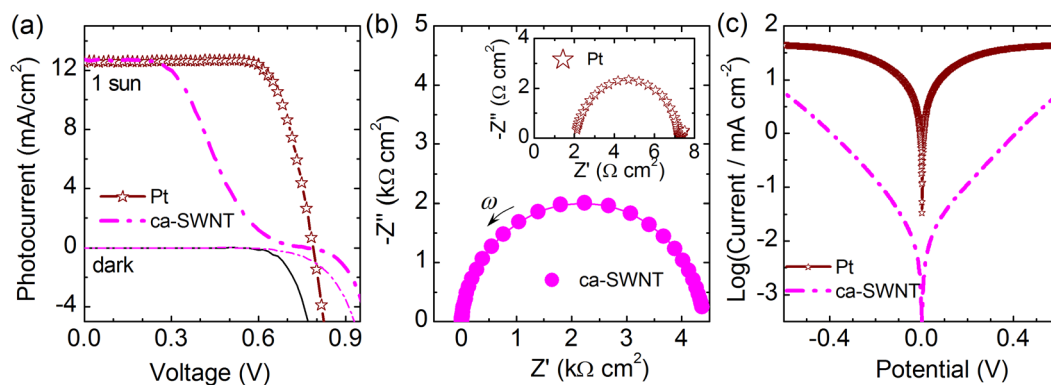

**Fig. S5** (a) Photovoltaic and (b, c) electrochemical characterizations for  $I^-/I_3^-$  redox electrolyte employed in DSCs and symmetrical dummy cells with the ca-SWNT or Pt counter electrodes. The iodine-based DSCs employed a conventional double-layer ( $14 + 6 \mu\text{m}$ )  $\text{TiO}_2$  photo-anode sensitized with ruthenium-based N719 dye described in elsewhere.<sup>S4</sup> The  $I^-/I_3^-$ -based electrolyte consisted of 0.8 M 1,2-dimethyl-3-propylimidazolium iodide (DMPIImI), 0.05 M LiI, 0.1 M  $\text{I}_2$ , 0.1 M guanidine thiocyanate (GuNCS), and 0.5 M 4-*tert*-butylpyridine (tBP) in acetonitrile.

**Table S1.** Photovoltaic parameters of iodine-based DSCs under the illumination of  $100 \text{ mW}/\text{cm}^2$  (1 sun) and interfacial  $R_{\text{CT}}$  of symmetrical closed dummy cells at an open-circuit voltage.

| CE      | $V_{\text{OC}}$ (V) | $J_{\text{SC}}$ ( $\text{mA}/\text{cm}^2$ ) | FF    | $\eta$ (%) | $R_{\text{CT}}$ ( $\Omega \text{ cm}^2$ ) |
|---------|---------------------|---------------------------------------------|-------|------------|-------------------------------------------|
| Pt      | 0.788               | 12.56                                       | 0.751 | 7.43       | 2.6                                       |
| ca-SWNT | 0.767               | 12.69                                       | 0.383 | 3.73       | 2,194                                     |

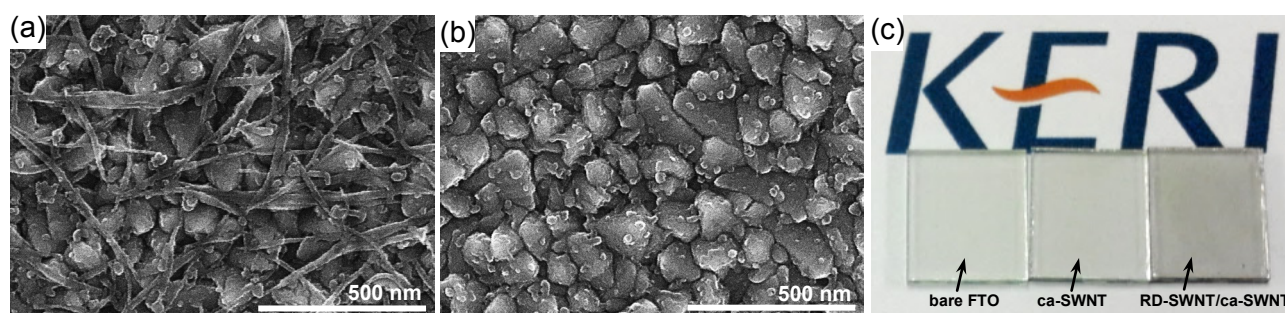

**Fig. S6** Top-view SEM images of an SWNT assembly (a) before and (b) after it was washed ultrasonically in acetone for 60 s. The unwashed SWNT assembly incorporated randomly-distributed SWNTs (RD-SWNTs) on top of the ca-SWNTs. (c) A photograph of the various SWNT assemblies on FTO glasses.

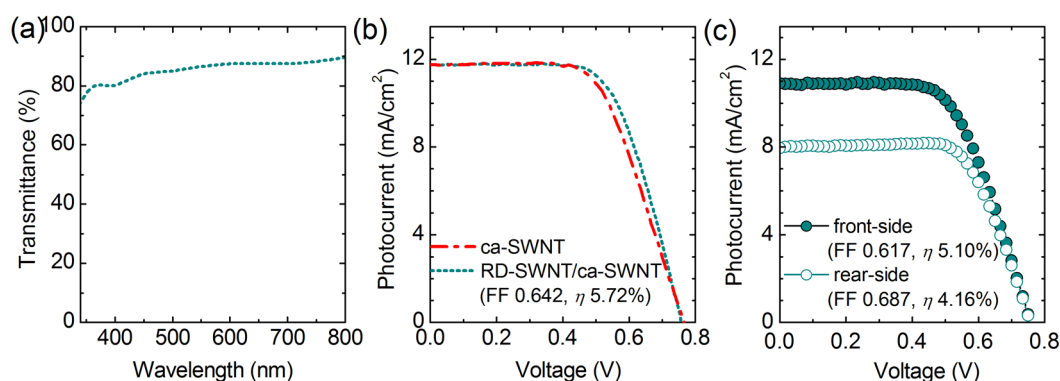

**Fig. S7** (a) Transmittance of the RD-SWNT/ca-SWNT on the basis of FTO glass. (b, c) Photovoltaic  $J-V$  curves of DSCs with the RD-SWNT/ca-SWNT CE. The dye-sensitized TiO<sub>2</sub> photo-anode consisted of a transparent and an opaque layer in the case of the normal opaque DSCs (b) and only a transparent layer in the case of the semi-transparent bifacial DSCs (c).

In this work, the wet assembly method used could increase the electroactive surface area only to a limited degree. As a result, we tried to use the unwashed RD-SWNTs physically adsorbed onto the ca-SWNTs (RD-SWNT/ca-SWNT) after the chemical assembly process. The physically adsorbed SWNTs were a few micrometres in length (Fig. S6) and supported a slightly higher FF of 0.642 and  $\eta$  of ~5.72%. However, the transmittance of the RD-SWNT/ca-SWNT electrode decreased substantially to 85.7% (Fig. S7a). We used both the ca-SWNT and the RD-SWNT/ca-SWNT CEs in bifacial DSCs to demonstrate the high performance of transparent CEs.

### References

- S1 Bard, A. J.; Faulkner, L. R. *Electrochemical Methods: Fundamentals and Applications*, 2nd ed., Wiley, New York, **2000**, pp. 231–239.
- S2 M. E. Orazem and B. Tribollet, *Electrochemical Impedance Spectroscopy*, Wiley, New Jersey, 2008, Chapter 13.
- S3 A. Hauch and A. Georg, *Electrochim. Acta*, 2001, **46**, 3457–3466.
- S4 S. H. Seo, S. Y. Kim, B.-K. Koo, S.-I. Cha and D. Y. Lee, *Langmuir*, 2010, **26**, 10341–10346.
